# Supplementary material for: Development of Tissue-Specific Age Predictors Using DNA Methylation Data
Source: MDPI journal article supplement (doi:10.3390/genes10110888), 2019-11-04
Supplement: s1 [file s1]

# Development of tissue-specific age predictors using DNA methylation data

Heeyeon Choi, Soobok Joe, Hojung Nam\*

School of Electrical Engineering and Computer Science, Gwangju Institute of Science of Technology, Gwangju, 61005, Republic of Korea

| Data Set               | Tissue Type | # of patients |    | Age range | Platform             |
|------------------------|-------------|---------------|----|-----------|----------------------|
| GSE49909               | Brain       | 78            |    | 1-82      | HumanMethylation 27  |
| GSE32393 <sup>2</sup>  | Breast      | 22            | 91 | 19-75     | HumanMethylation 450 |
| GSE67919 <sup>3</sup>  |             | 69            |    | 23-84     | HumanMethylation 450 |
| GSE77954 <sup>4</sup>  | Colon       | 11            | 98 | 49-85     | HumanMethylation 450 |
| GSE48988 <sup>5</sup>  |             | 87            |    | 50-80     | HumanMethylation 450 |
| GSE49909 <sup>1</sup>  | Kidney      | 82            |    | 2-86      | HumanMethylation 27  |
| GSE61258 <sup>6</sup>  | Liver       | 51            | 96 | 33-86     | HumanMethylation 450 |
| GSE48325 <sup>7</sup>  |             | 45            |    | 23-83     | HumanMethylation 450 |
| GSE83842 <sup>8</sup>  | Lung        | 11            |    | 51-80     | HumanMethylation 450 |
| GSE92767 <sup>9</sup>  | Saliva      | 53            | 99 | 18-73     | HumanMethylation 27  |
| GSE28746 <sup>10</sup> |             | 36            |    | 21-55     | HumanMethylation 27  |
| GSE53051 <sup>11</sup> | Thyroid     | 12            |    | 23-77     | HumanMethylation 450 |
| GSE30579 <sup>2</sup>  | Uterus      | 15            |    | 33-69     | HumanMethylation 27  |

**Supplementary Table 1. Independent dataset.** For validating tissue-specific age predictors, we collected independent dataset of every nine tissues from GEO database. This table shows the specific information about the dataset that we used.

GSE49909((Day, Waite et al. 2013), GSE32393(Zhuang, Jones et al. 2012), GSE67919(Hair, Xu et al. 2015), GSE77954(Qu, Sandmann et al. 2016), GSE48988(Noreen, Rösli et al. 2014), GSE61258(Horvath, Erhart et al. 2014), GSE48325(Ahrens, Ammerpohl et al. 2013), GSE83842(Kajiura, Masuda et al. 2017), GSE92767(Hong, Jung et al. 2017), GSE28946(Bocklandt, Lin et al. 2011), GSE53051(Timp, Bravo et al. 2014)

| Usage | Dataset          | Tissue type | Overlapped in MT predictor (Horvath 2013) |
|-------|------------------|-------------|-------------------------------------------|
| Train | GSE15745         | Brain       | X                                         |
|       | TCGA(BRCA)       | Breast      | O (test)                                  |
|       | TCGA(COAD,READ)  | Colon       | O(test)                                   |
|       | TCGA(KIRP, KIRC) | Kidney      | O (train)                                 |
|       | TCGA(LIHC)       | Liver       | O (test)                                  |
|       | GSE37988         |             | O (train)                                 |
|       | TCGA(LUAD, LUSC) | Lung        | O (train)                                 |
|       | GSE99029         | Saliva      | X                                         |
|       | GSE34035         |             | O (train)                                 |
|       | TCGA(THCA)       | Thyroid     | O (train)                                 |
|       | TCGA(UCEG)       | Uterus      | O (test)                                  |
|       | GSE30758         |             | O (test)                                  |
| Test  | GSE49909         | Brain       | X                                         |
|       | GSE32393         | Breast      | O (train)                                 |
|       | GSE67919         |             | X                                         |
|       | GSE77954         | Colon       | X                                         |
|       | GSE48988         |             | X                                         |
|       | GSE49909         | Kidney      | X                                         |
|       | GSE61258         | Liver       | X                                         |
|       | GSE48325         |             | X                                         |
|       | GSE83842         | Lung        | X                                         |
|       | GSE92767         | Saliva      | X                                         |
|       | GSE28746         |             | X                                         |
|       | GSE53051         | Thyroid     | X                                         |
|       | GSE3057          | Uterus      | X                                         |

**Supplementary Table 2. Common dataset with Hovarth et al.** There are some common training dataset with dataset used in Hovarth et al. However, For independent dataset for validating the model performance, we almostly used the dataset not used in the process of training the multi-tissue age predicto

| Number of common features | Count | CpG name                                                                                                                                                                                                                                                                                                                                                    |
|---------------------------|-------|-------------------------------------------------------------------------------------------------------------------------------------------------------------------------------------------------------------------------------------------------------------------------------------------------------------------------------------------------------------|
| 9                         | 1     | cg22736354'                                                                                                                                                                                                                                                                                                                                                 |
| 8                         | 1     | cg25148589'                                                                                                                                                                                                                                                                                                                                                 |
| 7                         | 4     | cg06458239', 'cg10523019', 'cg04084157', 'cg12373771'                                                                                                                                                                                                                                                                                                       |
| 6                         | 5     | cg06493994', 'cg04528819', 'cg22809047', 'cg22719623', 'cg20300246'                                                                                                                                                                                                                                                                                         |
| 5                         | 12    | cg03664992', 'cg20692569', 'cg06144905', 'cg19945840', 'cg00548268', 'cg02681442', 'cg18236477', 'cg27320127', 'cg00059225', 'cg25942450', 'cg19560758', 'cg12422450'                                                                                                                                                                                       |
| 4                         | 25    | cg05266781', 'cg19996355', 'cg15747595', 'cg17758721', 'cg06291867', 'cg06156376', 'cg26005082', 'cg21589115', 'cg22909609', 'cg08209133', 'cg17965019', 'cg03679581', 'cg10947146', 'cg00107187', 'cg02654291', 'cg12078929', 'cg10235817', 'cg21296230', 'cg00055233', 'cg10608333', 'cg09212468', 'cg17497271', 'cg06646021', 'cg14319409', 'cg12402251' |
| 3                         | 55    | cg23854009', 'cg27524460', 'cg27553955', 'cg00563932', 'cg06493386', 'cg12073594', 'cg18809289', 'cg23941599', 'cg09809672', 'cg08536841', 'cg09816471', 'cg23124451', 'cg22395019', 'cg18008766', 'cg18943383', 'cg12024906', 'cg07922606', 'cg13854874', 'cg06121469', 'cg07408456', 'cg26219051'<br>(Continue at Supplementary Aging marker list.xlsx)   |
| 2                         | 142   | cg04527918', 'cg12261786', 'cg19728223', 'cg03975694', 'cg16483916', 'cg08260959', 'cg26381783', 'cg19586576', 'cg23855989', 'cg25589890', 'cg17471102', 'cg25538571', 'cg25426302', 'cg12554573', 'cg03330678', 'cg02228185', 'cg05590982', 'cg07684796', 'cg16584172', 'cg16488098', 'cg25136310',<br>(Continue at Supplementary Aging marker list.xlsx)  |

**Supplementary Table 3. Number of Common features in tissue-common CpG groups.** This table shows the number of appearance in tissue-common aging markers in each tissue groups. More detailed information about markers are listed in Supplementary feature list file.

r.

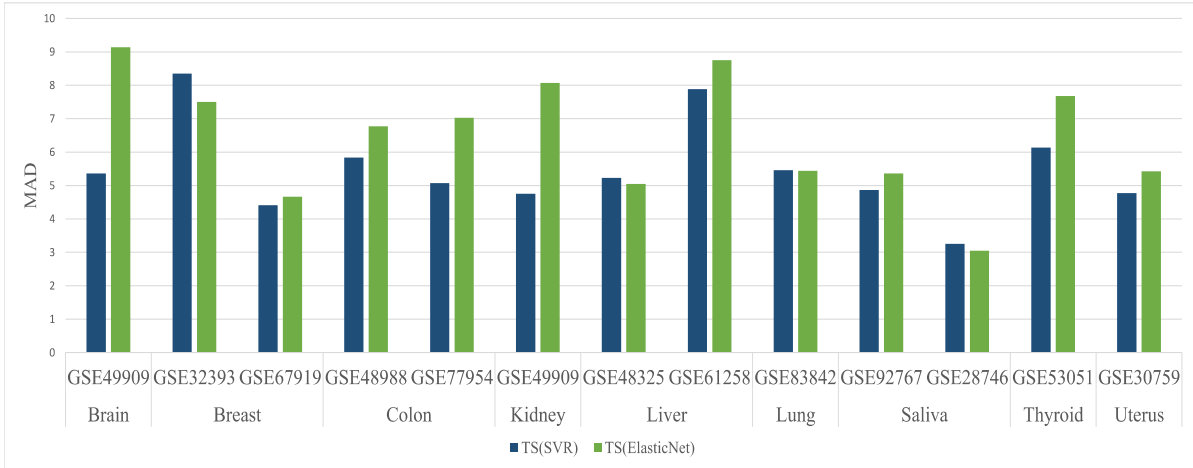

**Supplementary Figure 1. Comparison of SVR and Elastic Net regression method.** Using selected features, we applied SVR and Elastic Net regression algorithm. When we compared the Mean Absolute Deviation of two models, the model applied SVR algorithm showed better performance in every independent dataset. Thus we selected SVR algorithm for final model construction.

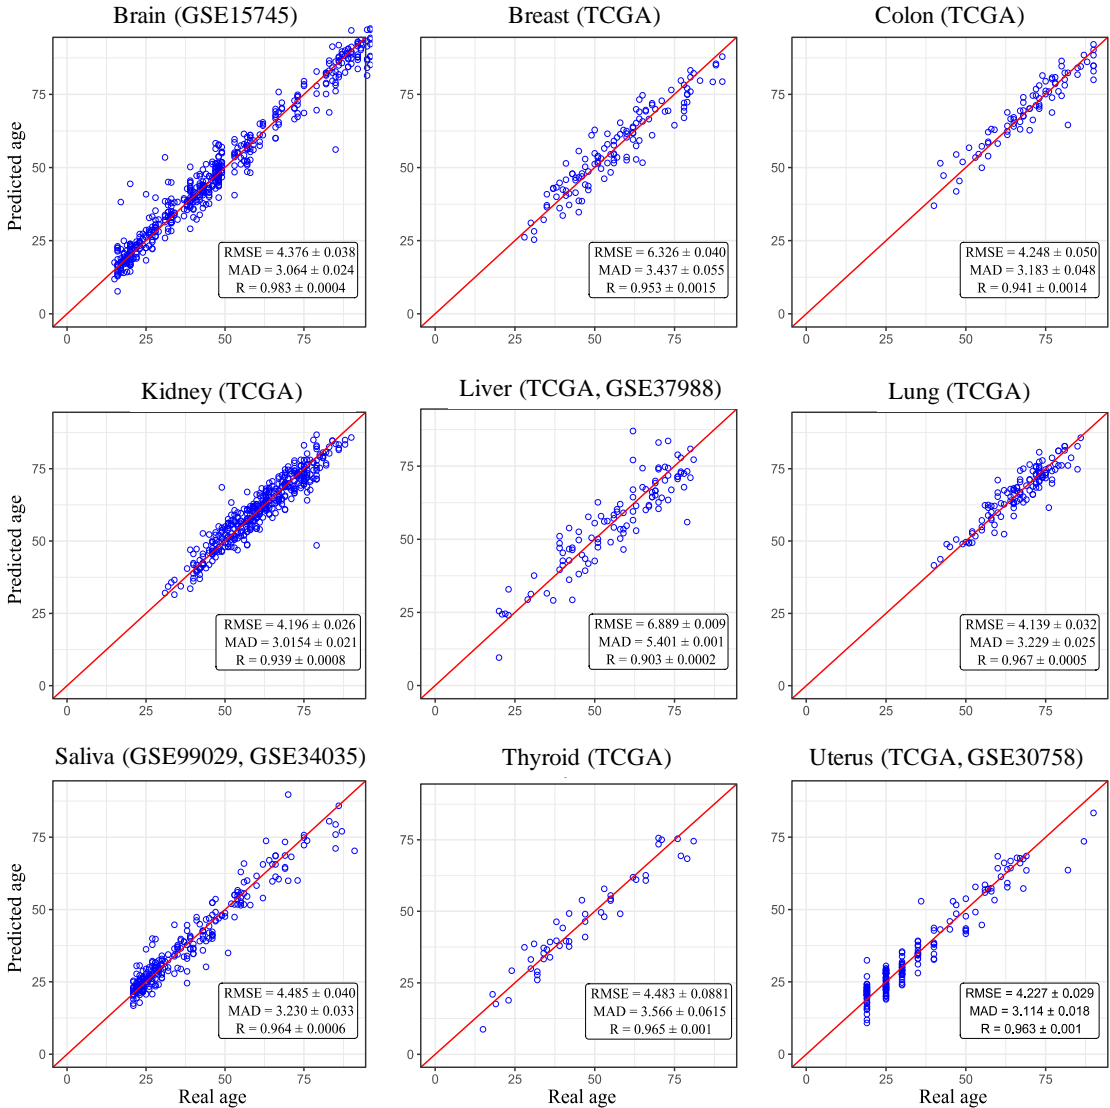

**Supplementary Figure 2. Internal validation.** This is the results of 10-fold cross validation of proposed tissue-specific age prediction model. It shows MAD of 3.519 years and R of 0.961 on average in nine tissue models. Results in brain (MAD = 3.064, R = 0.983), breast (MAD = 3.437, R = 0.953), colon (MAD = 3.183, R = 0.941), kidney (MAD = 3.015, R = 0.939), liver (MAD = 5.401, R = 0.903), lung (MAD = 3.229, R = 0.967), saliva (MAD = 3.230, R = 0.964), thyroid (MAD = 3.566, R = 0.965), uterus (MAD = 3.114, R = 0.963) are shown.

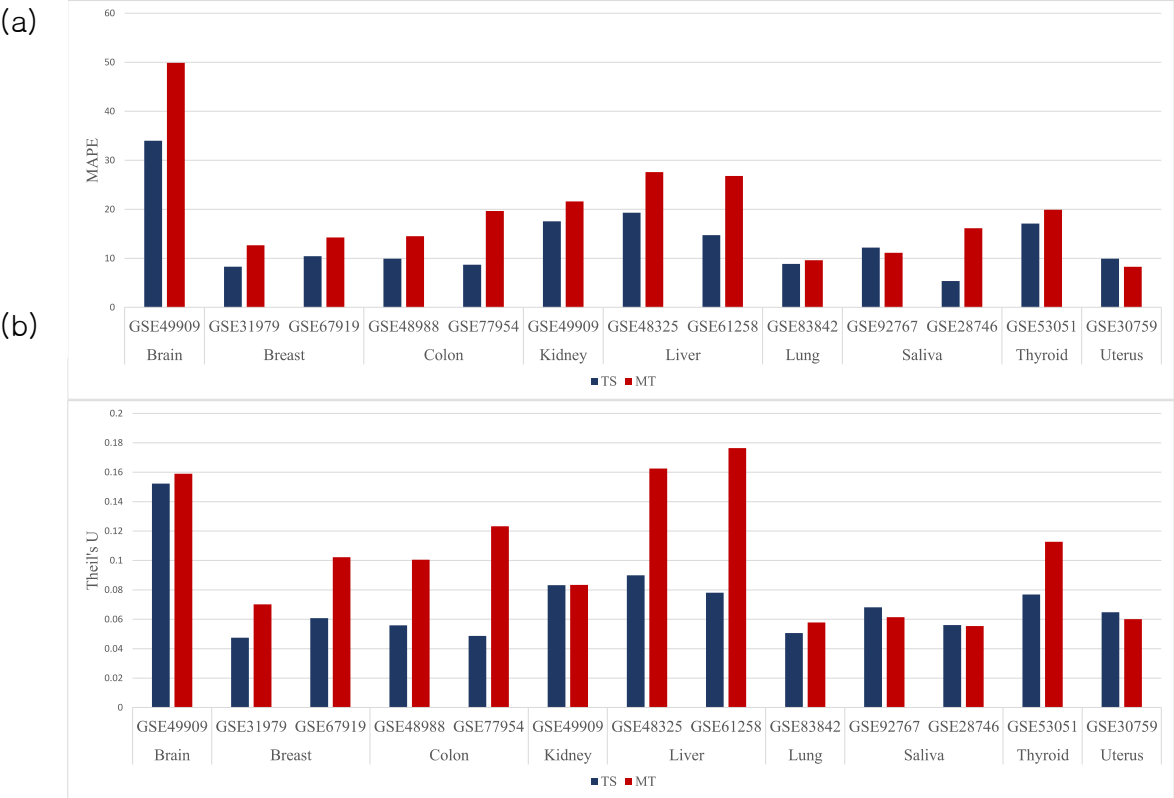

**Supplementary Figure 3. Comparison with other metric.** When we compared the performance of proposed tissue-specific age predictors and multi-tissue age predictors using other regression metrics, tissue-specific age predictors also showed better performance. (a) This is the result of Mean Absolute Percentage Error (MAPE) of each model in independent datasets from nine tissues. In almost all dataset, tissue-specific age predictors showed lower MAPE. (b) This is the result of Theil's U statistics of each model in independent datasets from nine tissues. Likewise, tissue-specific age predictors showed lower Theil's U statistics.

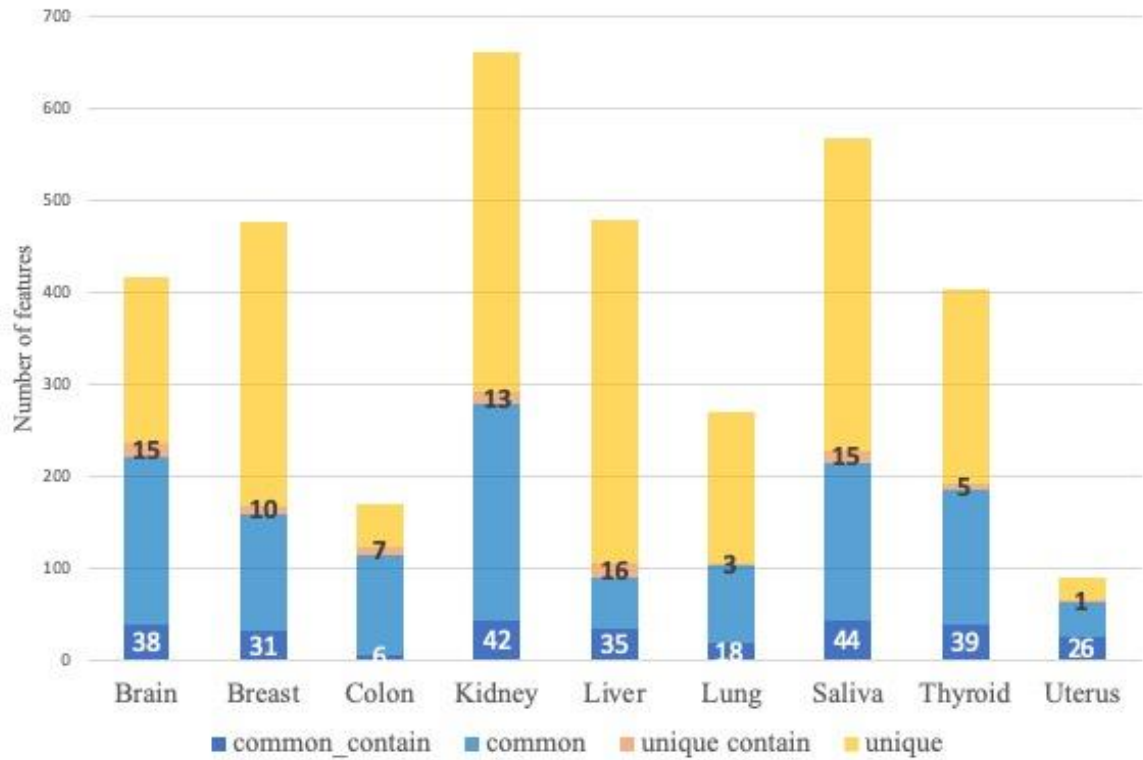

**Supplementary Figure 4. Number of common features with hovarth.** This figures showed the number of common features with features used for multi-tissue age predictors. In every 9 tissues, less than 10% of features are overlapped with multi-tissue age predictors. It shows that many features are uniquely attributed to tissue-specific age prediction. Besides, tissue-common groups more contain features of multi-tissue age predictor.

66

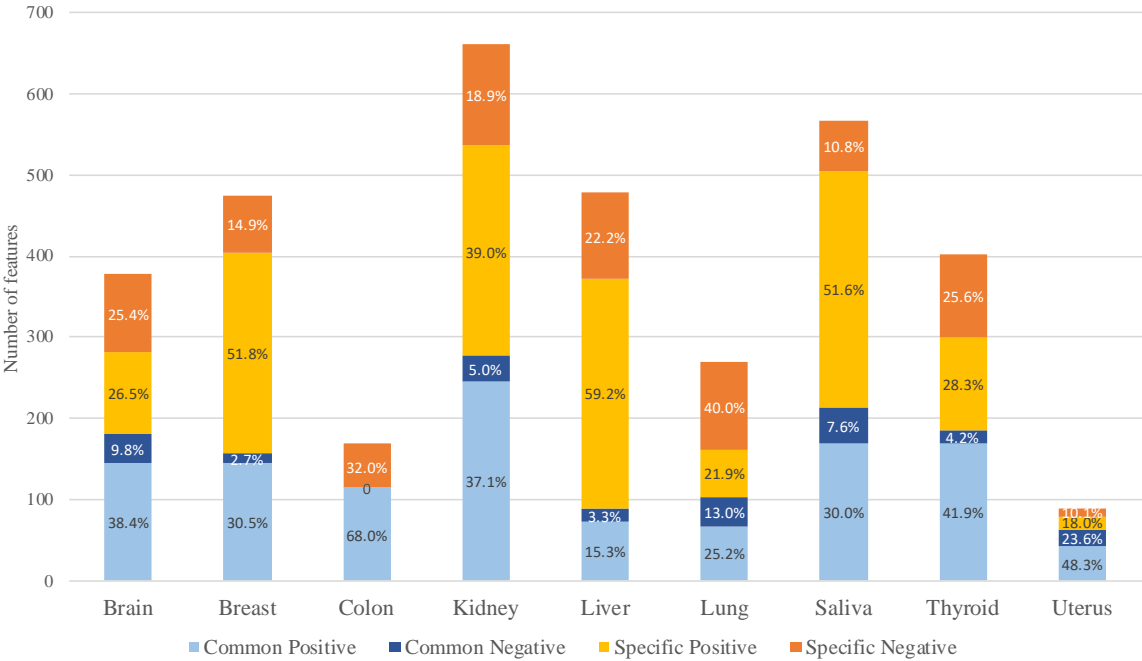

**Supplementary Figure 5. Ratio of positive and negative ageCGs** This figures showed the ratio of positive ageCGs and negative ageCGs in tissue-common and tissue-specific groups. Generally, more positive ageCGs were found, but the tissue-specific group had more negative ageCGs than that of tissue-common group.

67

68

69

70

71

72

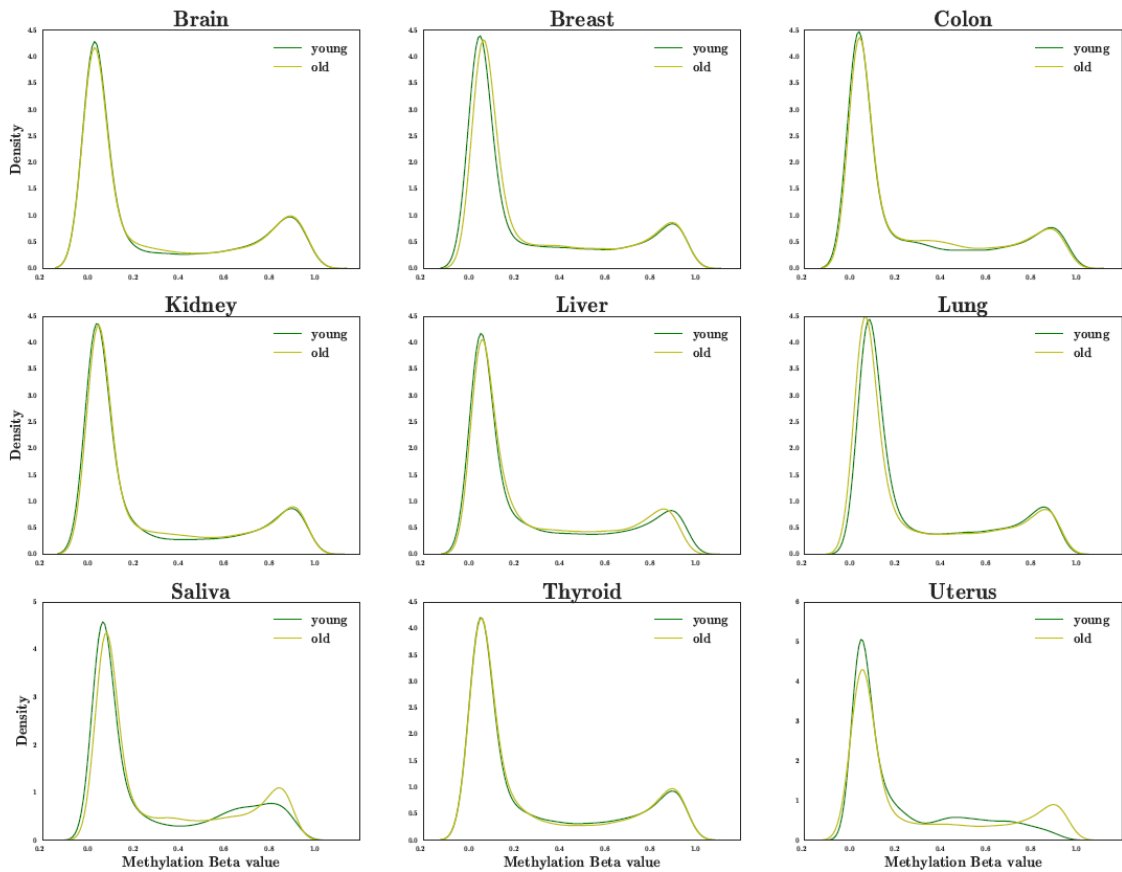

**Supplementary Figure 6a. General methylation pattern difference in young and old group.** These figures showed total methylation difference in young and old group of each tissue dataset. We compared the distribution of beta-value of whole markers in 27K platform. As a result, there are no statistically significant differences in two groups when we compared every methylation site.

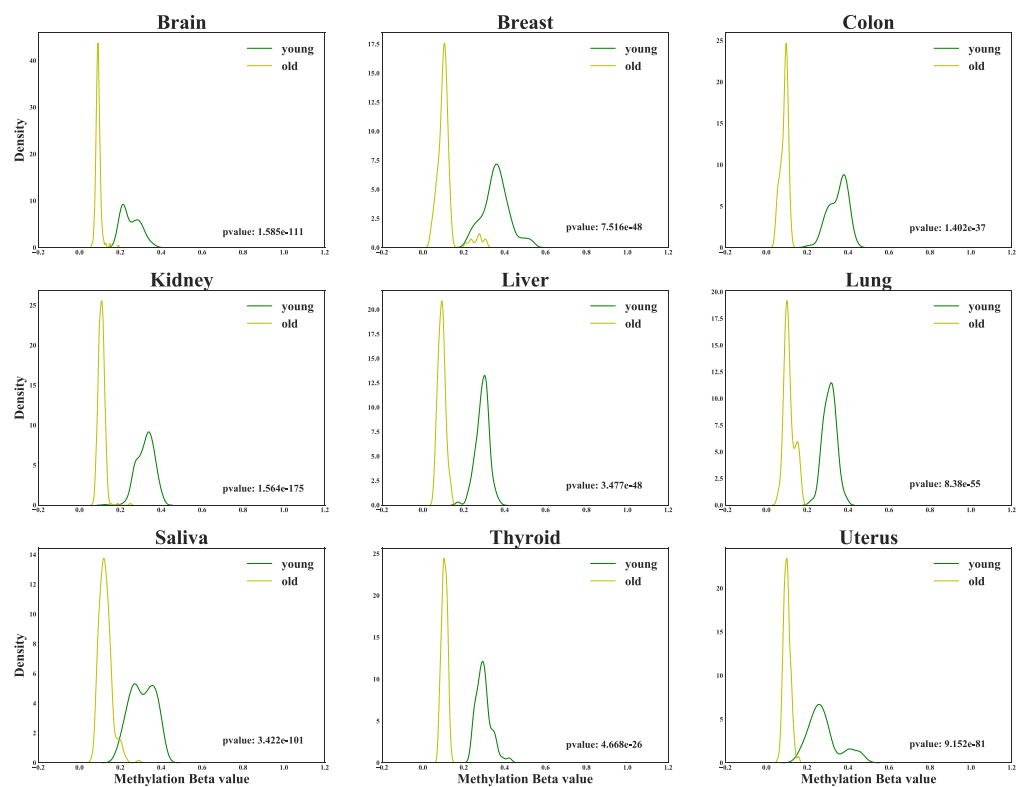

**Supplementary Figure 6b. Aging-related methylation pattern difference in young and old group.** These figures show that aging-related methylation sites has clear difference in old group than those of young group. Generally, Aging-related CpG sites are more methylated by getting aged. When we compared the distribution of beta-value of selected features in each tissue model, two groups showed significant differences(kolmogorov smirnov test).

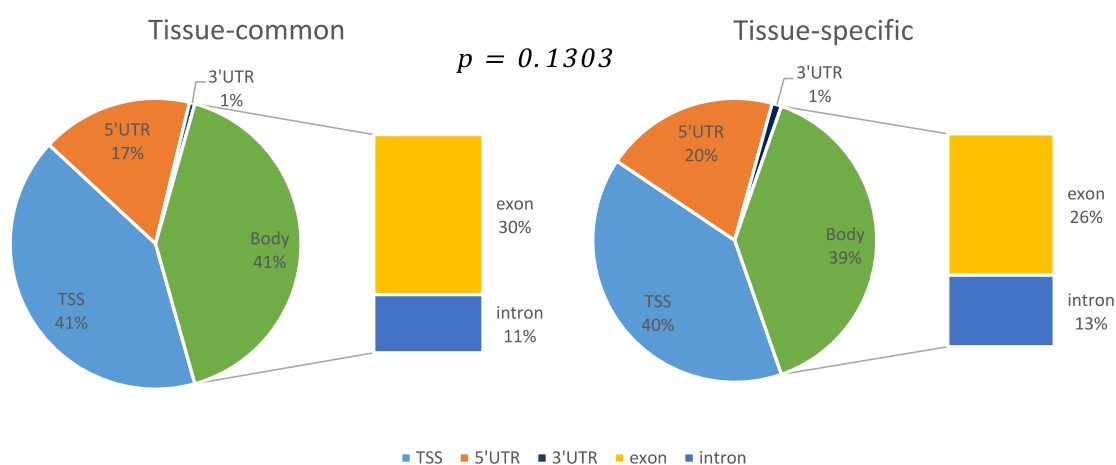

**Supplementary Figure 7. Exon and intron ratio in tissue-common and tissue-specific group.** This is the ratio of methylation regions in gene body regions in tissue-common and specific group. Although it is not significant, exon and intron ratio of two groups show slightly different ratio.

| pos/neg         | GOID       | GOTerm                                                          | PValue  | Corrected Pvalue |
|-----------------|------------|-----------------------------------------------------------------|---------|------------------|
| Positive ageCGs | GO:0007156 | homophilic cell adhesion via plasma membrane adhesion molecules | 0.00000 | 0.00002          |
|                 | GO:0060452 | positive regulation of cardiac muscle contraction               | 0.00001 | 0.00009          |
|                 | GO:0090659 | walking behavior                                                | 0.00002 | 0.00016          |
|                 | GO:0045989 | positive regulation of striated muscle contraction              | 0.00003 | 0.00023          |
|                 | GO:0051931 | regulation of sensory perception                                | 0.00051 | 0.00191          |
| Negative ageCGs | GO:0050795 | regulation of behavior                                          | 0.00182 | 0.00182          |
|                 | GO:0035914 | skeletal muscle cell differentiation                            | 0.00175 | 0.00219          |
|                 | GO:0009301 | snRNA transcription                                             | 0.00175 | 0.00219          |
|                 | GO:0042795 | snRNA transcription from RNA polymerase II promoter             | 0.00175 | 0.00219          |
|                 | GO:0050434 | positive regulation of viral transcription                      | 0.00044 | 0.00222          |

**Supplementary Table 4. Gene Ontology Analysis of tissue-common group.** This is the top five significant gene ontology in positive and negative ageCGs in tissue-common group. Corrected p-value is calculated using Benjamini-Hochberg methods.

| Tissue  | GOID       | GOTerm                                                          | PValue  | Corrected Pvalue |
|---------|------------|-----------------------------------------------------------------|---------|------------------|
| Brain   | GO:0001755 | neural crest cell migration                                     | 0.00048 | 0.00241          |
|         | GO:0007422 | peripheral nervous system development                           | 0.00245 | 0.00307          |
| Breast  | GO:0033146 | regulation of intracellular estrogen receptor signaling pathway | 0.00192 | 0.01306          |
|         | GO:0061377 | mammary gland lobule development                                | 0.00584 | 0.01656          |
| Colon   | GO:0030513 | positive regulation of BMP signaling pathway                    | 0.00005 | 0.00070          |
|         | GO:0016114 | terpenoid biosynthetic process                                  | 0.00033 | 0.00094          |
| Kidney  | GO:0071300 | cellular response to retinoic acid                              | 0.00177 | 0.00530          |
|         | GO:0048384 | retinoic acid receptor signaling pathway                        | 0.00159 | 0.00794          |
| Liver   | GO:0021591 | ventricular system development                                  | 0.00002 | 0.00058          |
|         | GO:2000738 | positive regulation of stem cell differentiation                | 0.00023 | 0.00145          |
| Lung    | GO:0090314 | positive regulation of protein targeting to membrane            | 0.00002 | 0.00003          |
|         | GO:0090313 | regulation of protein targeting to membrane                     | 0.00003 | 0.00003          |
| Saliva  | GO:0003197 | endocardial cushion development                                 | 0.00001 | 0.00020          |
|         | GO:0034332 | adherens junction organization                                  | 0.00007 | 0.00063          |
| Thyroid | GO:0048644 | muscle organ morphogenesis                                      | 0.00304 | 0.00390          |
|         | GO:0043525 | positive regulation of neuron apoptotic process                 | 0.00088 | 0.00396          |

**Supplementary Table 5a. Gene Ontology Analysis of positive ageCGs of tissue-specific group.**

This is the result of top two significant gene ontology in positive ageCGs in tissue-specific group in each tissue. Because uterus model had too small number of features for analysis, it was excluded from gene ontology analysis table.

| Tissue  | GOID       | GO Term                                                           | PValue  | Corrected Pvalue |
|---------|------------|-------------------------------------------------------------------|---------|------------------|
| Brain   | GO:0048640 | negative regulation of developmental growth                       | 0.00023 | 0.00301          |
|         | GO:0071850 | mitotic cell cycle arrest                                         | 0.00166 | 0.00720          |
| Breast  | GO:1900077 | negative regulation of cellular response to insulin stimulus      | 0.00003 | 0.00015          |
|         | GO:0046627 | negative regulation of insulin receptor signaling pathway         | 0.00002 | 0.00024          |
| Kidney  | GO:0002576 | platelet degranulation                                            | 0.00016 | 0.00096          |
|         | GO:0007595 | lactation                                                         | 0.00118 | 0.00236          |
| Liver   | GO:2000404 | regulation of T cell migration                                    | 0.00006 | 0.00025          |
|         | GO:2000401 | regulation of lymphocyte migration                                | 0.00020 | 0.00039          |
| Lung    | GO:0050654 | chondroitin sulfate proteoglycan metabolic process                | 0.00028 | 0.00103          |
|         | GO:0019800 | peptide cross-linking via chondroitin 4-sulfate glycosaminoglycan | 0.00013 | 0.00142          |
| Saliva  | GO:0051447 | negative regulation of meiotic cell cycle                         | 0.00072 | 0.00145          |
|         | GO:0051445 | regulation of meiotic cell cycle                                  | 0.00312 | 0.00312          |
| Thyroid | GO:0097006 | regulation of plasma lipoprotein particle levels                  | 0.00018 | 0.00036          |
|         | GO:0034381 | plasma lipoprotein particle clearance                             | 0.00068 | 0.00068          |

#### Supplementary Table 5b. Gene Ontology Analysis of negative ageCGs of tissue-specific group.

This is the result of top two significant gene ontology in negative ageCGs in tissue-specific group in each tissue. Because uterus and colon had too small number of features for analysis, they were excluded from gene ontology analysis table.

| cg22736354            | Brain  | Breast | Colon | Kidney | Liver  | Lung  | Saliva | Thyroid | Uterus |
|-----------------------|--------|--------|-------|--------|--------|-------|--------|---------|--------|
| <b>Slope</b>          | 267.78 | 116.8  | 55.08 | 83.83  | 134.29 | 55.04 | 147.27 | 235.4   | 150.8  |
| <b>Correlation(R)</b> | 0.89   | 0.64   | 0.36  | 0.53   | 0.68   | 0.33  | 0.71   | 0.65    | 0.83   |
| <b>F-test</b>         | <0.05  | <0.05  | <0.05 | <0.05  | <0.05  | <0.05 | <0.05  | <0.05   | <0.05  |

**Supplementary Table 6. The comparison with cg22736354 methylation and age in each tissue.** we noted that the slopes of the methylation level of this single cg22736354 were calculated by single linear fit model with age. R represents Pearson's correlation coefficient. F-test represents the values in table are less than FDR 0.05.

## References

- Ahrens, M., O. Ammerpohl, W. von Schönfels, J. Kolarova, S. Bens, T. Itzel, A. Teufel, A. Herrmann, M. Brosch and H. Hinrichsen (2013). "DNA methylation analysis in nonalcoholic fatty liver disease suggests distinct disease-specific and remodeling signatures after bariatric surgery." Cell metabolism **18**(2): 296-302.
- Bocklandt, S., W. Lin, M. E. Sehl, F. J. Sánchez, J. S. Sinsheimer, S. Horvath and E. Vilain (2011). "Epigenetic predictor of age." PloS one **6**(6): e14821.
- Day, K., L. L. Waite, A. Thalacker-Mercer, A. West, M. M. Bamman, J. D. Brooks, R. M. Myers and D. Absher (2013). "Differential DNA methylation with age displays both common and dynamic features across human tissues that are influenced by CpG landscape." Genome biology **14**(9): R102.
- Hair, B. Y., Z. Xu, E. L. Kirk, S. Harlid, R. Sandhu, W. R. Robinson, M. C. Wu, A. F. Olshan, K. Conway and J. A. Taylor (2015). "Body mass index associated with genome-wide methylation in breast tissue." Breast cancer research and treatment **151**(2): 453-463.
- Hong, S. R., S.-E. Jung, E. H. Lee, K.-J. Shin, W. I. Yang and H. Y. Lee (2017). "DNA methylation-based age prediction from saliva: high age predictability by combination of 7 CpG markers." Forensic Science International: Genetics **29**: 118-125.
- Horvath, S. (2013). "DNA methylation age of human tissues and cell types." Genome Biol **14**(10): R115.
- Horvath, S., W. Erhart, M. Brosch, O. Ammerpohl, W. von Schönfels, M. Ahrens, N. Heits, J. T. Bell, P.-C. Tsai and T. D. Spector (2014). "Obesity accelerates epigenetic aging of human liver." Proceedings of the National Academy of Sciences **111**(43): 15538-15543.
- Kajiura, K., K. Masuda, T. Naruto, T. Kohmoto, M. Watabnabe, M. Tsuboi, H. Takizawa, K. Kondo, A. Tangoku and I. Imoto (2017). "Frequent silencing of the candidate tumor suppressor TRIM58 by promoter methylation in early-stage lung adenocarcinoma." Oncotarget **8**(2): 2890.
- Noreen, F., M. Rösli, P. Gaj, J. Pietrzak, S. Weis, P. Urfer, J. Regula, P. Schär and K. Truninger (2014). "Modulation of age-and cancer-associated DNA methylation change in the healthy colon by aspirin and lifestyle." JNCI: Journal of the National Cancer Institute **106**(7).
- Qu, X., T. Sandmann, H. Frierson Jr, L. Fu, E. Fuentes, K. Walter, K. Okrah, C. Rumpel, C. Moskaluk and S. Lu (2016). "Integrated genomic analysis of colorectal cancer progression reveals activation of EGFR through demethylation of the EREG promoter." Oncogene **35**(50): 6403.
- Timp, W., H. C. Bravo, O. G. McDonald, M. Goggins, C. Umbricht, M. Zeiger, A. P. Feinberg and R. A. Irizarry (2014). "Large hypomethylated blocks as a universal defining epigenetic alteration in human solid tumors." Genome medicine **6**(8): 61.
- Zhuang, J., A. Jones, S.-H. Lee, E. Ng, H. Fiegl, M. Zikan, D. Cibula, A. Sargent, H. B. Salvesen and I. J. Jacobs (2012). "The dynamics and prognostic potential of DNA methylation changes at stem cell gene loci in women's cancer." PLoS genetics **8**(2): e1002517.
